# Supplementary material for: A donor–acceptor–donor conjugated molecule: twist intramolecular charge transfer and piezochromic luminescent properties
Source: Royal Society of Chemistry journal article supplement (doi:10.1039/c3cc48980a), 2014-01-01
Supplement: c3cc48980a.pdf [file c3cc48980a.pdf]

**Supplemental Information**  
**For**  
**A Donor-Acceptor-Donor Conjugated Molecule: Twist**  
**Intramolecular Charge Transfer and Piezochromic Luminescent**  
**Property**

Zi-Hao Guo, Ze-Xin Jin, Jie-Yu Wang\* and Jian Pei\*

Beijing National Laboratory for Molecular Sciences, the Key Laboratory of Bioorganic Chemistry  
and Molecular Engineering of Ministry of Education, College of Chemistry and Molecular  
Engineering, Peking University, Beijing 100871, China  
[jianpei@pku.edu.cn](mailto:jianpei@pku.edu.cn), [jieyuwang@pku.edu.cn](mailto:jieyuwang@pku.edu.cn)

**Content**

1. Photophysical and DSC measurements
2. Reversible switching of the emission
3. DFT calculation
4. Synthetic part

## 1. Photophysical and DSC measurements

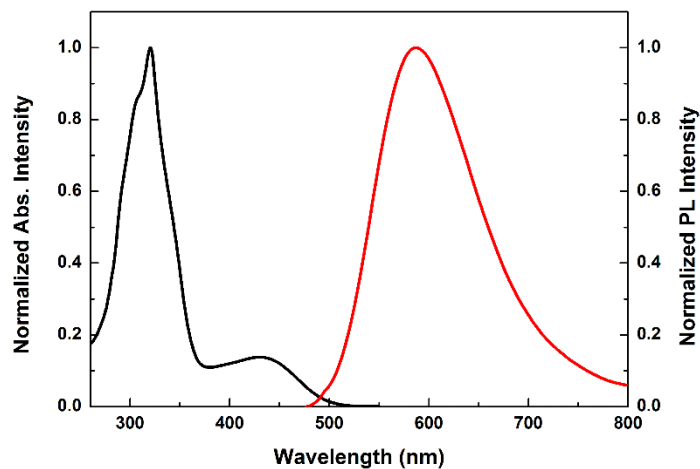

**Figure S1.** Absorption and emission spectra of **AQDBD** in dilute  $\text{CH}_2\text{Cl}_2$  solution ( $10^{-5}$  M).

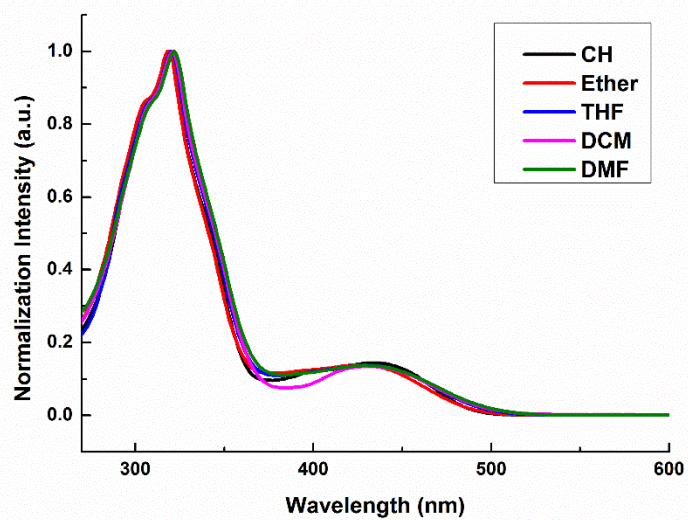

**Figure S2.** Absorption spectra of **AQDBD** in different solvents ( $10^{-5}$  M), varying from cyclohexane to DMF in the sequence of permittivity. (CH: cyclohexane; Ether: diethyl ether; THF: tetrahydrofuran; DCM: dichloromethane; DMF: dimethylformamide)

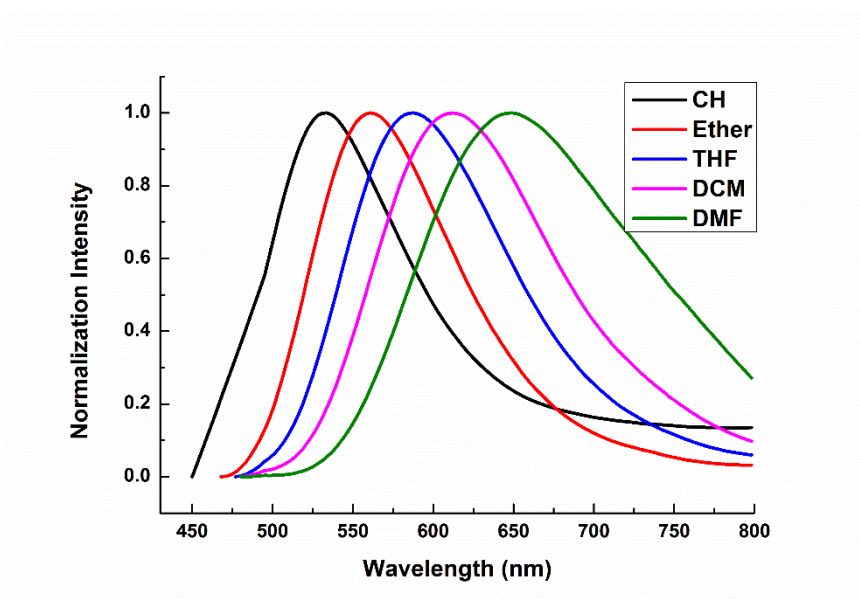

**Figure S3.** Emission spectra of AQDBD in different solvents ( $10^{-5}$  M), varying from cyclohexane to DMF in the sequence of permittivity.

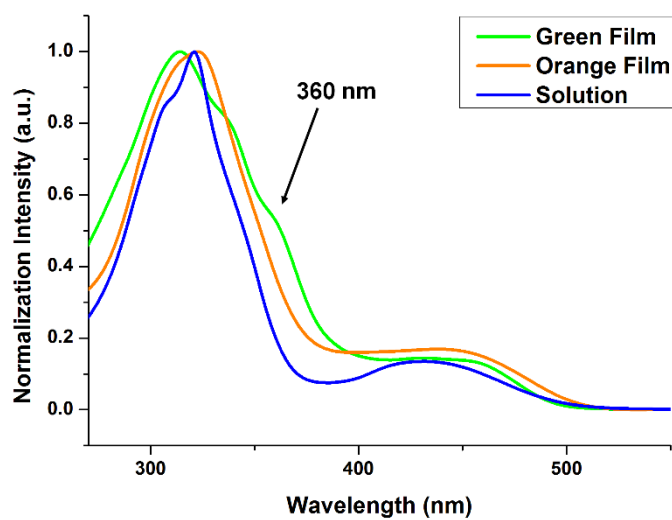

**Figure S4.** Absorption spectra of green, orange films, and solution of AQDBD.

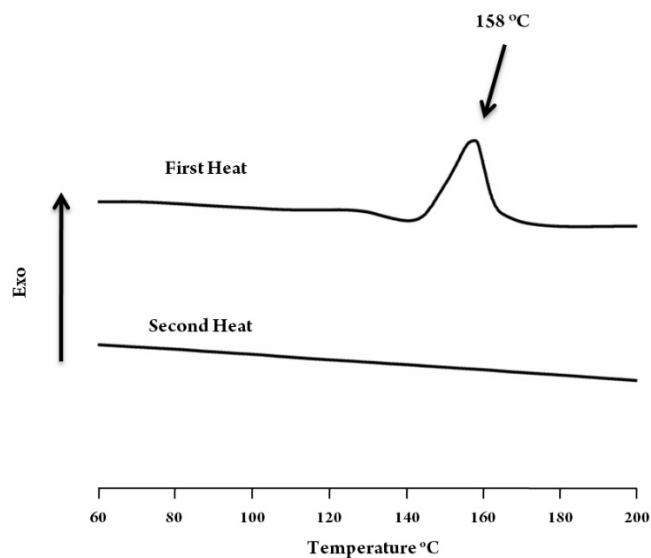

**Figure S5.** DSC profile of AQDBD with an exothermic peak in the first cycling.

**Table S1.** Optical property of AQDBD in different solvent.

|                         | CH   | Tol  | THF  | DCM  | Acetone | DMF  | DMSO | CH <sub>3</sub> CN |
|-------------------------|------|------|------|------|---------|------|------|--------------------|
| $\eta$ (%) <sup>a</sup> | 60   | 49   | 41   | 31   | 18      | 10   | 7    | 3                  |
| $\lambda_{em}$ (nm)     | 522  | 541  | 570  | 590  | 596     | 600  | 609  | 605                |
| $\epsilon$ <sup>b</sup> | 2.10 | 2.38 | 7.35 | 9.14 | 21.4    | 36.7 | 45.0 | 38.8               |

<sup>a</sup> The fluorescence quantum yields in different solvents was test by integrating sphere system on HORIBA JobinYvon Nanolog FL3-2iHR spectrometer. <sup>b</sup> The permittivity of different solvents.

## 2. Reversible switching of the emission

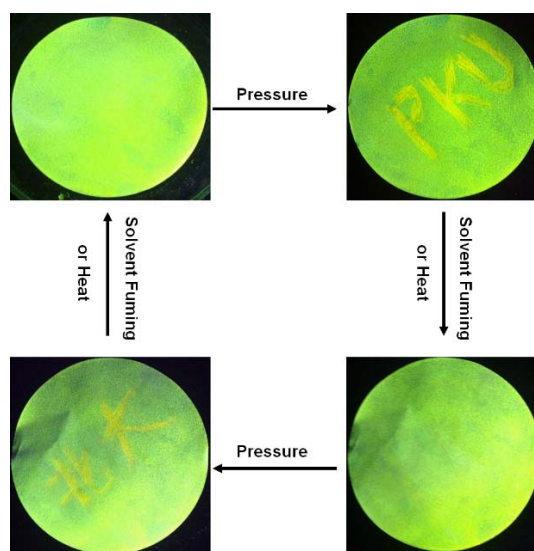

**Figure S6.** Reversible switching of the emission color of AQDBD on filter paper.

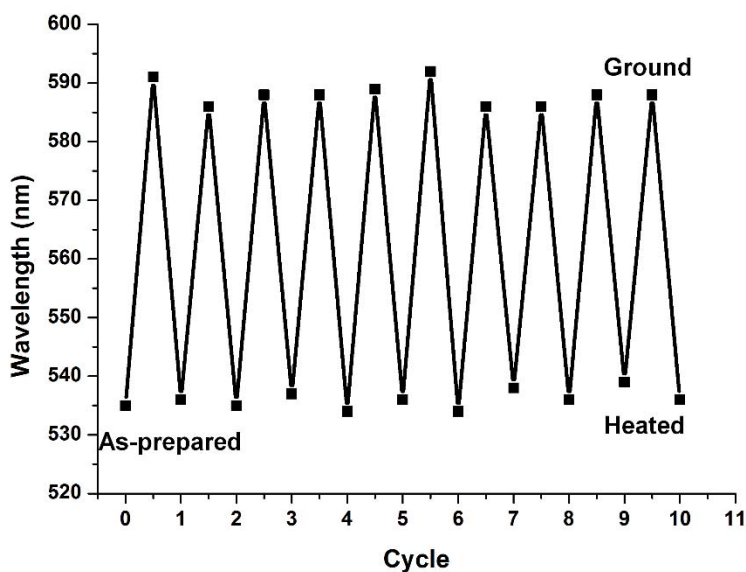

**Figure S7.** Emission wavelengths of the repeated conversion between the ground and after heated at 160 for 5 min of AQDBD.

### 3. DFT calculation

Atomic structures of AQDBD were optimized with density functional theory (DFT) calculations using B3LYP/6-31G at different twist angles from  $0^\circ$  to  $180^\circ$  between TPA and acceptor core with a step length of  $10^\circ$ . Two TPA donors were in cross fashion which have lower ground state energy compared to parallel one at different twist angles. Molecular orbital shapes and energies were calculated at the optimized geometries. Orbital pictures were generated with Gaussview 5.0. All quantum-chemical calculations were performed with the Gaussian09 package.

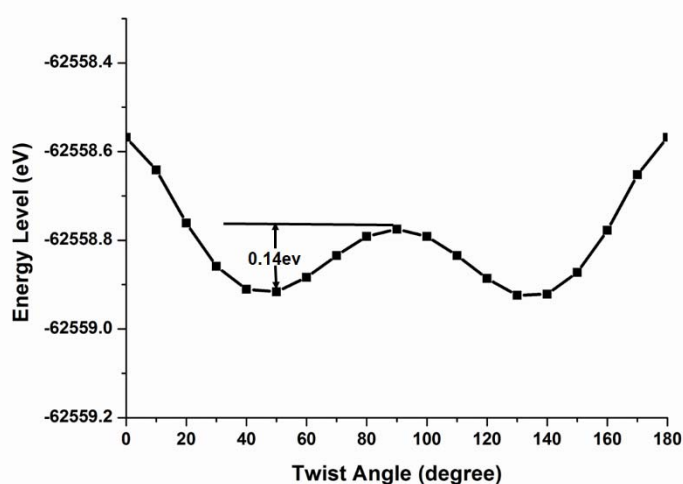

**Figure S8.** The ground state energy of AQDBD at different twist angles between donor and acceptor in the gas phase

#### 4. Synthetic part

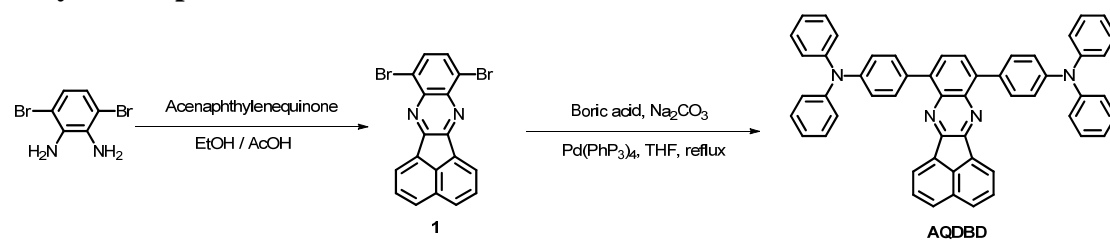

**Scheme S1.** The synthetic routes to **AQDBD**.

**8,11-Dibromoacenaphtho[1,2-b]quinoxaline (1).** A mixture of 3,6-dibromobenzene-1,2-diamine (53 mg, 0.2 mmol), acenaphthylenequinone (54 mg, 0.3 mmol), and acetic acid (1 mL) were refluxed in ethanol (20 ml) overnight under nitrogen atmosphere. After removal of ethanol under reduced pressure, the residue was dissolved in CH<sub>2</sub>Cl<sub>2</sub>. The mixture was washed with water, and then dried over anhydrous Na<sub>2</sub>SO<sub>4</sub>. After removal of the solvent under reduced pressure, the residue was further purified by column chromatography (silica gel, PE:CH<sub>2</sub>Cl<sub>2</sub> = 1:2) to give **1** as a yellow solid (72 mg). Yield: 87%. <sup>1</sup>H NMR (400 MHz, CDCl<sub>3</sub>, ppm): δ 8.57-8.55 (d, *J* = 7.0 Hz, 2H), 8.18-8.16 (d, *J* = 8.2 Hz, 2H), 7.93 (s, 2H), 7.91–7.87 (t, *J* = 7.6 Hz, 2H).

**4,4'-(Acenaphtho[1,2-b]quinoxaline-8,11-diyl)bis(*N,N*-diphenylaniline) (AQDBD).** To a mixture of **1** (82 mg, 0.2 mmol), (4-(diphenylamino)phenyl)boronic acid (144 mg, 0.5 mmol), Pd(PPh<sub>3</sub>)<sub>4</sub> (30 mg, 0.026 mmol), and sodium carbonate (170 mg, 1.61 mmol) were added THF (40 mL) and water (10 mL). The mixture was refluxed overnight under nitrogen atmosphere. After quenched with aqueous NH<sub>4</sub>Cl solution, the mixture was extracted with CH<sub>2</sub>Cl<sub>2</sub>. The combined organic extracts were washed with brine and dried over anhydrous Na<sub>2</sub>SO<sub>4</sub>. After removal of the solvents under reduced pressure, the residue was purified by column chromatography (silica gel, PE : CHCl<sub>3</sub> = 1 : 1) to afford **AQDBD** as a yellow solid (123 mg). Yield: 83%. <sup>1</sup>H NMR (400 MHz, C<sub>2</sub>D<sub>2</sub>Cl<sub>4</sub>, ppm): δ 8.39-8.38 (d, *J* = 7.0 Hz, 2H), 8.15-8.13 (d, *J* = 8.2 Hz, 2H), 7.91–7.84 (m, 8H), 7.38–7.28 (m, 20H), 7.13-7.10 (t, *J* = 7.2 Hz, 4H). <sup>13</sup>C NMR (100 MHz, C<sub>2</sub>Cl<sub>4</sub>D<sub>2</sub>, ppm): δ 152.9, 147.7, 147.3, 139.3, 139.2, 136.7, 132.5, 132.2, 132.2, 130.1, 129.8, 129.7, 129.6, 128.9, 124.9, 123.3, 122.8, 122.2. EI-HRMS: Calcd. for [M + H]<sup>+</sup>: 741.3013. Found: 741.3005.
